# Supplementary material
Source: Springer Nature journal article supplement (https://www.springermedizin.de/resource/supplementary/12958_2006_344_MOESM3_ESM.pdf/9567670)

$G_0/G_1$  phase

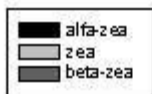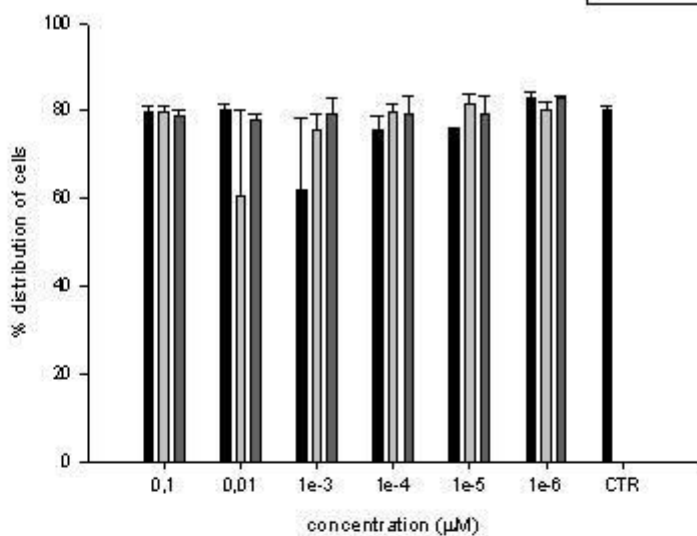

S+G<sub>2</sub>/M phase

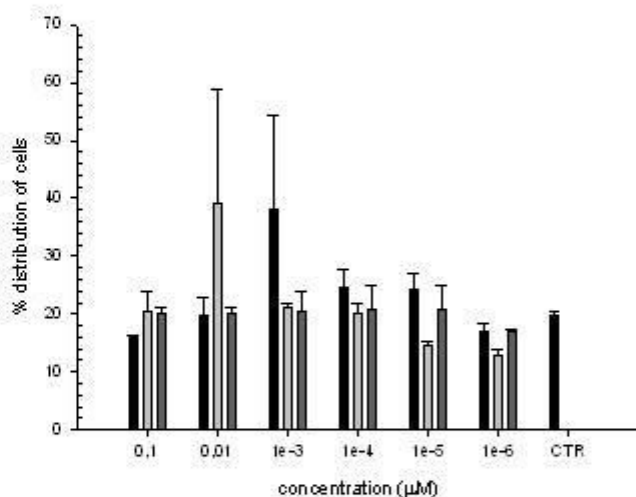

apoptotic peak

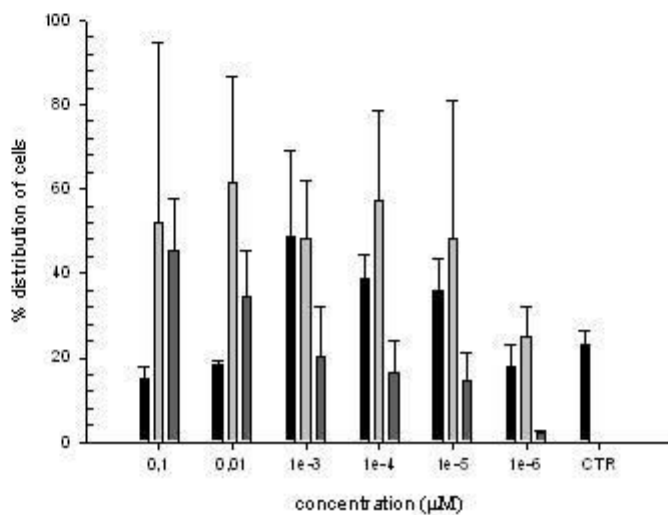

Supplement: MOESM3 [file 9567670]
